# Supplementary material for: Overexpression of ankyrin1 promotes pancreatic cancer cell growth
Source: PubMed Central journal article supplement (PMC5085203; doi:10.18632/oncotarget.9009), 2016-04-26
Supplement: oncotarget-07-34977-s001.pdf [file oncotarget-07-34977-s001.pdf]

## Supplemental Table 1

---

---

### **Bisulfite modified sequencing**

---

---

|      |            |                                   |
|------|------------|-----------------------------------|
| ANK1 | Forward    | 5'-GAGGAGGTGTTTTTGTAAATTTG-3'     |
|      | Reverse    | 5'-CACCTACTACCTTCAACTAC-3'        |
|      | Sequencing | 5'-ACCTAAATAACCCCCTCCTAACATCTC-3' |

---

### **Methylation specific PCR**

---

---

|      |           |                               |
|------|-----------|-------------------------------|
| ANK1 | M-MSP (F) | 5'-GAGCGTTCGGTTCGATAG-3'      |
|      | M-MSP (R) | 5'-TACGAAACCTATAACGTACG-3'    |
|      | U-MSP (F) | 5'-GGGAGTGTTTGGTTTGATAGT-3'   |
|      | U-MSP (R) | 5'-CTCTACAAAACCTATAACATACA-3' |

---

### **Quantitative RT-PCR**

---

---

|            |         |                              |
|------------|---------|------------------------------|
| Large ANK1 | Forward | 5'-GGCCCGCAACGACGACACG-3'    |
|            | Reverse | 5'-AATGTGCAGGGGCGTGAATC-3'   |
| Small ANK1 | Forward | 5'-TCAGGGGGTCCCTGTGCTTTGT-3' |
|            | Reverse | 5'-GCCCTGCTCATCCGTGAATTGC-3' |
| GAPDH      | Forward | 5'-CCATGGAGAAGGCTGGGG-3'     |
|            | Reverse | 5'-CAAAGTTGTCATGGATGACC-3'   |
| PGK1       | Forward | 5'-CTCCAGGAGCTCCAACTG-3'     |
|            | Reverse | 5'-GCTCTCATGGATGAGGTGGT-3'   |
